# Supplementary material for: Serine ADP-ribosylation in Drosophila provides insights into the evolution of reversible ADP-ribosylation signalling
Source: PubMed Central journal article supplement (PMC10238386; doi:10.1038/s41467-023-38793-y), 2023-06-02
Supplement: 41467_2023_38793_MOESM1_ESM.pdf [file 41467_2023_38793_MOESM1_ESM.pdf]

## Supplemental Information

### Serine ADP-ribosylation in *Drosophila* provides insights into the evolution of reversible ADP-ribosylation signaling

Pietro Fontana<sup>1,2,3,\*</sup>, Sara C. Buch-Larsen<sup>4,\*</sup>, Osamu Suyari<sup>1,\*</sup>, Rebecca Smith<sup>1</sup>, Marcin J. Suskiewicz<sup>1,5</sup>, Kira Schützenhofer<sup>1</sup>, Antonio Ariza<sup>1,6</sup>, Johannes Gregor Matthias Rack<sup>1,7</sup>, Michael L. Nielsen<sup>4</sup>, Ivan Ahel<sup>1</sup>

<sup>1</sup> Sir William Dunn School of Pathology, University of Oxford, South Parks Road, Oxford, OX1 3RE, UK.

<sup>2</sup> Department of Biological Chemistry and Molecular Pharmacology, Harvard Medical School, Boston, MA, USA.

<sup>3</sup> Program in Cellular and Molecular Medicine, Boston Children's Hospital, Boston, MA, USA.

<sup>4</sup> Proteomics program, Novo Nordisk Foundation Center for Protein Research, Faculty of Health and Medical Sciences, University of Copenhagen, Blegdamsvej 3B, 2200 Copenhagen, Denmark.

<sup>5</sup> Current address: Centre de Biophysique Moléculaire, UPR4301 CNRS, rue Charles Sadron, CEDEX 2, F-45071 Orléans, France.

<sup>6</sup> Current address: School of Biosciences, University of Sheffield, Western Bank, Sheffield, S10 2TN, UK.

<sup>7</sup> Current address: MRC Centre for Medical Mycology, School of Biosciences, University of Exeter, Geoffrey Pope Building, Exeter, EX4 4QD, UK.

\*These authors contributed equally.

#### Correspondence to:

Ivan Ahel (ivan.ahel@path.ox.ac.uk)

Michael L. Nielsen (michael.lund.nielsen@cpr.ku.dk)

Johannes G. M. Rack (j.rack@exeter.ac.uk)

Antonio Ariza (a.ariza@sheffield.ac.uk)

**Supplemental Table 1. PARP sequences utilized to analyse automodification domain.**

| species                               |                            |                        |                        |                 |
|---------------------------------------|----------------------------|------------------------|------------------------|-----------------|
| binominal name                        | common name <sup>a</sup>   | accession <sup>b</sup> | ARH3 homologue present | HPF1 with PBZ   |
| <b>Insecta</b>                        |                            |                        |                        |                 |
| <i>Acromyrmex heyeri</i>              | Formiga-de-monte-vermelha  | KAG5332370             | yes                    | yes             |
| <i>Aphis gossypii</i>                 | Cotton aphid               | XP_027836345           | no                     | yes             |
| <i>Apis mellifera</i>                 | Honey bee                  | XP_624477              | yes                    | yes             |
| <i>Athalia rosae</i>                  | Coleseed sawfly            | XP_012253348           | yes                    | yes             |
| <i>Bemisia tabaci</i>                 | Silverleaf whitefly        | CAH0393176             | yes                    | yes             |
| <i>Blattella germanica</i>            | German cockroach           | PSN54639               | yes                    | yes             |
| <i>Bombyx mori</i>                    | Domestic silk moth         | XP_004926518           | no                     | yes             |
| <i>Cimex lectularius</i>              | Bed bug                    | XP_014252361           | yes                    | yes             |
| <i>Cloeon dipterum</i>                | Pond Olive                 | CAB3383108             | no                     | no <sup>c</sup> |
| <i>Cryptotermes secundus</i>          | <i>n.a.</i>                | XP_023719718           | yes                    | yes             |
| <i>Danaus plexippus plexippus</i>     | Monarch Butterfly          | OWR47253               | no                     | yes             |
| <i>Diabrotica virgifera virgifera</i> | Western corn rootworm      | XP_028137801           | yes                    | yes             |
| <i>Drosophila melanogaster</i>        | Fruit fly                  | NP_001104452           | no                     | yes             |
| <i>Formica exsecta</i>                | Narrow-headed ant          | XP_029670266           | yes                    | yes             |
| <i>Frankliniella occidentalis</i>     | Western flower thrips      | XP_026271855           | yes                    | yes             |
| <i>Galleria mellonella</i>            | Greater wax moth           | XP_026751130           | no                     | yes             |
| <i>Harmonia axyridis</i>              | Halloween beetle           | XP_045461901           | yes                    | yes             |
| <i>Homalodisca vitripennis</i>        | Glassy-winged sharpshooter | XP_046681652           | yes                    | yes             |
| <i>Hyposmocoma kahamanoa</i>          | <i>n.a.</i>                | XP_026328627           | no                     | yes             |
| <i>Ignelater luminosus</i>            | Cucubano                   | KAJ2885554             | yes                    | yes             |
| <i>Ischnura elegans</i>               | Blue-tailed damselfly      | XP_046383121           | yes                    | yes             |
| <i>Lasius niger</i>                   | Black garden ant           | KMQ98224               | yes                    | yes             |
| <i>Monomorium pharaonis</i>           | Pharaoh ant                | XP_012538492           | yes                    | yes             |
| <i>Musca domestica</i>                | Housefly                   | XP_005175605           | no                     | yes             |
| <i>Myzus persicae</i>                 | Green peach aphid          | XP_022178738           | no                     | yes             |
| <i>Ooceraea biroi</i>                 | Clonal raider ant          | XP_011334668           | yes                    | yes             |
| <i>Photinus pyralis</i>               | Common eastern firefly     | XP_031330927           | yes                    | yes             |
| <i>Schistocerca americana</i>         | American grasshopper       | XP_046979867           | yes                    | yes             |
| <i>Sipha flava</i>                    | Yellow sugarcane aphid     | XP_025410796           | no                     | yes             |
| <i>Sitophilus oryzae</i>              | Rice weevil                | XP_030752809           | yes                    | yes             |
| <i>Thrips palmi</i>                   | Melon thrips               | XP_034248574           | no                     | yes             |
| <i>Timema tahoe</i>                   | <i>n.a.</i>                | CAD7458304             | yes                    | yes             |
| <i>Tribolium castaneum</i>            | Red flour beetle           | EFA00829               | yes                    | yes             |
| <i>Tribolium madens</i>               | Black flour beetle         | XP_044269707           | yes                    | yes             |
| <i>Trichoplusia ni</i>                | Cabbage looper             | XP_026729426           | no                     | yes             |
| <i>Zerene cesonia</i>                 | Dogface butterfly          | XP_038210310           | no                     | yes             |
| <b>Mammalia</b>                       |                            |                        |                        |                 |
| <i>Balaenoptera musculus</i>          | Blue whale                 | XP_036723058           | yes                    | no              |
| <i>Homo sapiens</i>                   | Human                      | NP_001609              | yes                    | no              |
| <i>Orycteropus afer afer</i>          | Aardvark                   | XP_007935170           | yes                    | no              |

<sup>a</sup>not applicable (*n.a.*) designates species with no common name

<sup>b</sup>GenBank accession number

<sup>c</sup>HPF domain is predicted to be part of a multidomain protein (GenBank CAB3360198) with unique architecture. Our analysis of the genomic region revealed the presence of a potential PBZ coding region upstream of the HPF domain.

**Supplemental Table 2. Data collection and refinement statistics (molecular replacement)**

|                                                                   | <i>d</i> Parg <sup>a</sup><br>(PDB 8ADK) | <i>d</i> Parg:PDD00017273 <sup>a</sup><br>(PDB 8ADJ) |
|-------------------------------------------------------------------|------------------------------------------|------------------------------------------------------|
| <b>Data collection</b>                                            |                                          |                                                      |
| Space group                                                       | <i>P</i> 2 <sub>1</sub>                  | <i>P</i> 2 <sub>1</sub>                              |
| Cell dimensions                                                   |                                          |                                                      |
| <i>a</i> , <i>b</i> , <i>c</i> (Å)                                | 93.43, 115.62, 122.91                    | 93.39, 115.90, 123.27                                |
| $\alpha$ , $\beta$ , $\gamma$ (°)                                 | 90.00, 90.00, 112.21                     | 90.00, 90.00, 112.21                                 |
| Resolution (Å) <sup>b</sup>                                       | 58.95 – 2.48 (2.53 – 2.48)               | 59.02 – 2.51 (2.58 – 2.51)                           |
| <i>R</i> <sub>sym</sub> or <i>R</i> <sub>merge</sub> <sup>b</sup> | 0.087 (1.116)                            | 0.133 (2.020)                                        |
| <i>I</i> / $\sigma$ <sup>b</sup>                                  | 9.6 (1.1)                                | 9.6 (1.1)                                            |
| Completeness (%) <sup>b</sup>                                     | 99.7 (99.3)                              | 100.0 (100.0)                                        |
| Redundancy <sup>b</sup>                                           | 3.3 (3.4)                                | 6.7 (6.7)                                            |
| <b>Refinement</b>                                                 |                                          |                                                      |
| Resolution (Å)                                                    | 2.47                                     | 2.51                                                 |
| No. reflections                                                   | 85715                                    | 83225                                                |
| <i>R</i> <sub>work</sub> / <i>R</i> <sub>free</sub>               | 0.177 / 0.228                            | 0.183 / 0.223                                        |
| No. atoms                                                         |                                          |                                                      |
| Protein                                                           | 12576                                    | 12521                                                |
| Ligand/ion                                                        | 63/3                                     | 165/3                                                |
| Water                                                             | 277                                      | 201                                                  |
| <i>B</i> -factors                                                 |                                          |                                                      |
| Protein                                                           | 70.57                                    | 72.70                                                |
| Ligand/ion                                                        | 85.17/75.39                              | 79.27/81.75                                          |
| Water                                                             | 51.91                                    | 55.00                                                |
| R.m.s. deviations                                                 |                                          |                                                      |
| Bond lengths (Å)                                                  | 0.0123                                   | 0.0092                                               |
| Bond angles (°)                                                   | 1.895                                    | 1.681                                                |

<sup>a</sup>Data were collected from a single crystal<sup>b</sup>Values in parentheses are for highest-resolution shell.

**Supplemental Table 3. PARG sequences utilized for multiple sequence alignment.**

| <b>binominal name</b>           | <b>species<br/>common name<sup>a</sup></b> | <b>accession number<sup>b</sup></b> |
|---------------------------------|--------------------------------------------|-------------------------------------|
| <i>Caenorhabditis elegans</i>   | <i>n.a.</i>                                | NP_001023135 <sup>c</sup>           |
| <i>Caenorhabditis elegans</i>   | <i>n.a.</i>                                | NP_501496 <sup>d</sup>              |
| <i>Drosophila bunnanda</i>      | <i>n.a.</i>                                | KAH8234568                          |
| <i>Drosophila melanogaster</i>  | Fruit fly                                  | NP_001245511                        |
| <i>Felis catus</i>              | Domestic cat                               | XP_011285559                        |
| <i>Homo sapiens</i>             | Human                                      | NP_003622                           |
| <i>Loa loa</i>                  | Eye worm                                   | XP_020303580                        |
| <i>Monosiga brevicollis</i> MX1 | <i>n.a.</i>                                | XP_001748857                        |
| <i>Mus musculus</i>             | Mouse                                      | NP_036090                           |
| <i>Musca domestica</i>          | House fly                                  | XP_005174952                        |
| <i>Tetrahymena thermophila</i>  | <i>n.a.</i>                                | XP_001013101                        |
| <i>Vombatus ursinus</i>         | Common wombat                              | XP_027715098                        |
| <i>Zeugodacus cucurbitae</i>    | Melon fly                                  | XP_011177346                        |

<sup>a</sup>not applicable (*n.a.*)

<sup>b</sup>GenBank accession number

<sup>c</sup>Sequence of PARG1

<sup>d</sup>Sequence of PARG2

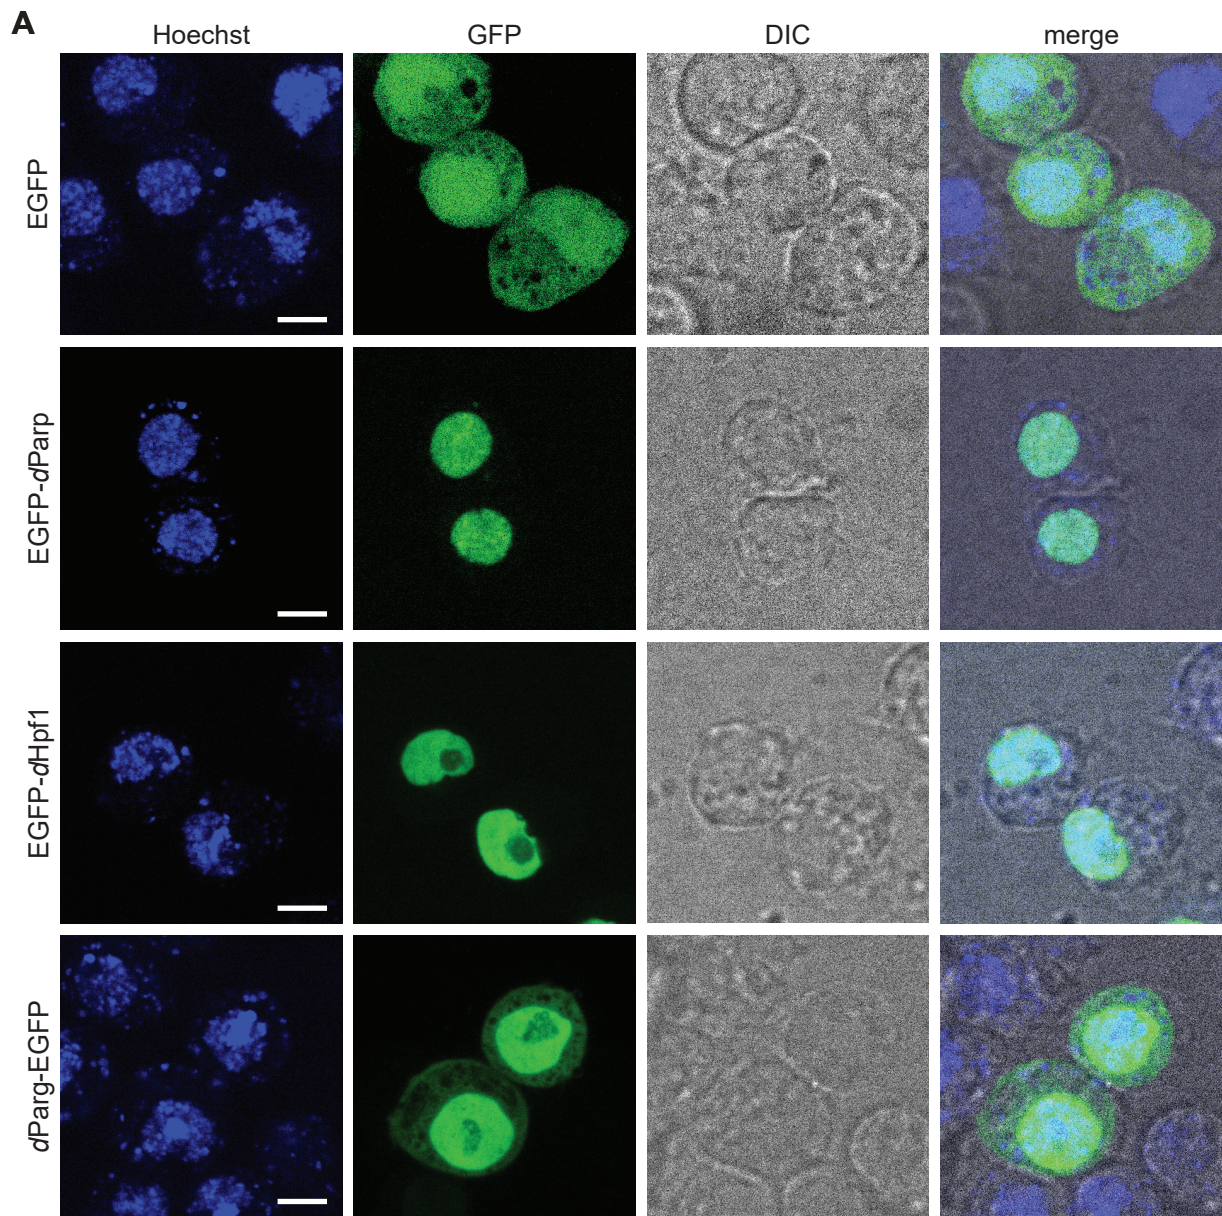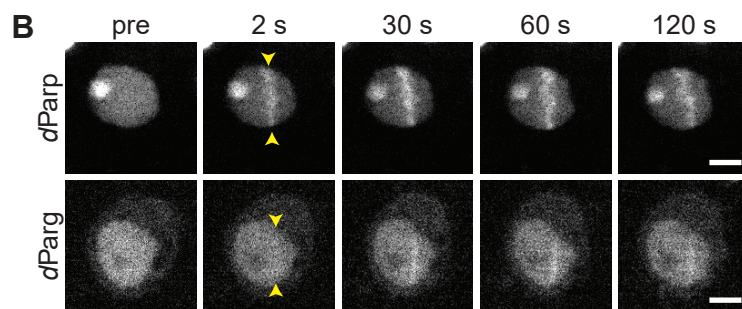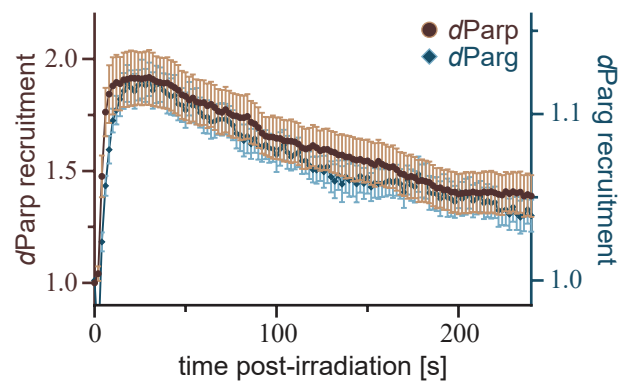

**Supplemental Figure 1. Subcellular localisation of the *Drosophila* DDR-ADPr enzymes.**

(A) Representative images of EGFP, EGFP-*d*Parp, EGFP-*d*Hpf1 and *d*Parg-EGFP expressed in *Drosophila* SR2<sup>+</sup> cells. Hoechst is used to indicate localisation of the nucleus. Scale bar, 2  $\mu$ m. Sites of irradiation are indicated by yellow arrows. The experiment was repeated independently three times with similar results.

(B) Representative images (top) and kinetics (bottom) of EGFP-*d*Parp and *d*Parg-EGFP recruitment to sites of DNA damage induced by 405 nm laser irradiation, in *Drosophila* S2R<sup>+</sup> cells. Scale bar, 2  $\mu$ m. Data from B are a representative of 3 independent replicates where data were collected from 16-25 cells per condition and represent normalised mean values  $\pm$  SEM.

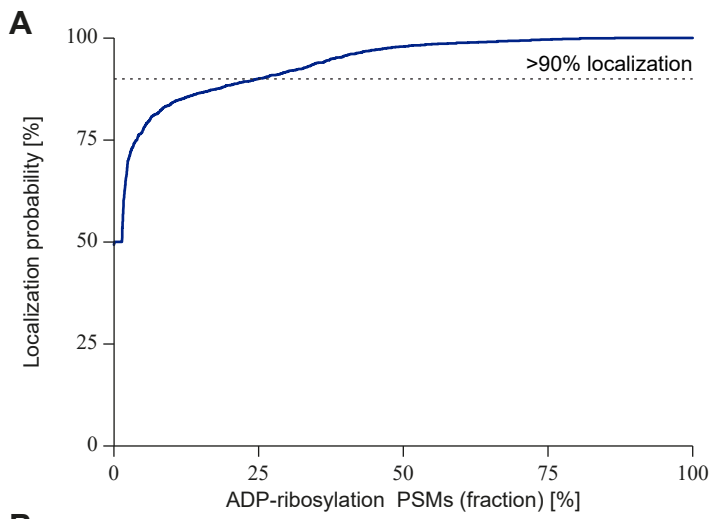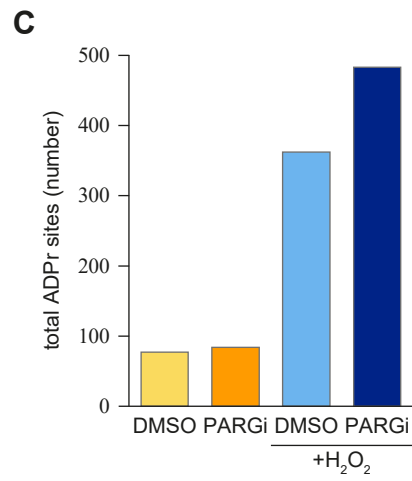

**B**

|                                       | DMSO + H <sub>2</sub> O <sub>2</sub> |      |      |      | DMSO |      |      |      | PARGi + H <sub>2</sub> O <sub>2</sub> |      |      |      | PARGi |      |      |      |      |
|---------------------------------------|--------------------------------------|------|------|------|------|------|------|------|---------------------------------------|------|------|------|-------|------|------|------|------|
|                                       | R1                                   | R2   | R3   | R4   | R1   | R2   | R3   | R4   | R1                                    | R2   | R3   | R4   | R1    | R2   | R3   | R4   |      |
| DMSO + H <sub>2</sub> O <sub>2</sub>  | R1                                   |      | 0.90 | 0.58 | 0.88 | 0.49 | 0.58 | 0.51 | 0.74                                  | 0.73 | 0.83 | 0.54 | 0.82  | 0.65 | 0.72 | 0.65 | 0.58 |
|                                       | R2                                   | 0.90 |      | 0.78 | 0.89 | 0.80 | 0.78 | 0.76 | 0.82                                  | 0.61 | 0.93 | 0.78 | 0.91  | 0.86 | 0.89 | 0.86 | 0.77 |
|                                       | R3                                   | 0.58 | 0.78 |      | 0.57 | 1.00 | 1.00 | 1.00 | 0.85                                  | 0.37 | 0.94 | 0.87 | 0.92  | 0.95 | 0.90 | 0.88 | 0.99 |
|                                       | R4                                   | 0.88 | 0.89 | 0.57 |      | 0.51 | 0.56 | 0.53 | 0.80                                  | 0.62 | 0.78 | 0.64 | 0.79  | 0.63 | 0.72 | 0.68 | 0.58 |
| DMSO                                  | R1                                   | 0.49 | 0.80 | 1.00 | 0.51 |      | 1.00 | 1.00 | 0.85                                  | 0.36 | 0.93 | 0.97 | 0.91  | 0.99 | 0.95 | 0.95 | 0.99 |
|                                       | R2                                   | 0.58 | 0.78 | 1.00 | 0.56 | 1.00 |      | 1.00 | 0.84                                  | 0.39 | 0.94 | 0.85 | 0.91  | 0.96 | 0.92 | 0.91 | 0.98 |
|                                       | R3                                   | 0.51 | 0.76 | 1.00 | 0.53 | 1.00 | 1.00 |      | 0.84                                  | 0.30 | 0.93 | 0.89 | 0.91  | 0.95 | 0.90 | 0.89 | 0.98 |
|                                       | R4                                   | 0.74 | 0.82 | 0.85 | 0.80 | 0.85 | 0.84 | 0.84 |                                       | 0.56 | 0.89 | 0.80 | 0.90  | 0.81 | 0.83 | 0.81 | 0.85 |
| PARGi + H <sub>2</sub> O <sub>2</sub> | R1                                   | 0.73 | 0.61 | 0.37 | 0.62 | 0.36 | 0.39 | 0.30 | 0.56                                  |      | 0.58 | 0.29 | 0.60  | 0.38 | 0.47 | 0.39 | 0.37 |
|                                       | R2                                   | 0.83 | 0.93 | 0.94 | 0.78 | 0.93 | 0.94 | 0.93 | 0.89                                  | 0.58 |      | 0.85 | 0.99  | 0.93 | 0.93 | 0.89 | 0.93 |
|                                       | R3                                   | 0.54 | 0.78 | 0.87 | 0.64 | 0.97 | 0.85 | 0.89 | 0.80                                  | 0.29 | 0.85 |      | 0.82  | 0.87 | 0.86 | 0.86 | 0.86 |
|                                       | R4                                   | 0.82 | 0.91 | 0.92 | 0.79 | 0.91 | 0.91 | 0.91 | 0.90                                  | 0.60 | 0.99 | 0.82 |       | 0.88 | 0.88 | 0.85 | 0.92 |
| PARGi                                 | R1                                   | 0.65 | 0.86 | 0.95 | 0.63 | 0.99 | 0.96 | 0.95 | 0.81                                  | 0.38 | 0.93 | 0.87 | 0.88  |      | 0.99 | 0.96 | 0.94 |
|                                       | R2                                   | 0.72 | 0.89 | 0.90 | 0.72 | 0.95 | 0.92 | 0.90 | 0.83                                  | 0.47 | 0.93 | 0.86 | 0.88  | 0.99 |      | 0.98 | 0.91 |
|                                       | R3                                   | 0.65 | 0.86 | 0.88 | 0.68 | 0.95 | 0.91 | 0.89 | 0.81                                  | 0.39 | 0.89 | 0.86 | 0.85  | 0.96 | 0.98 |      | 0.91 |
|                                       | R4                                   | 0.58 | 0.77 | 0.99 | 0.58 | 0.99 | 0.98 | 0.98 | 0.85                                  | 0.37 | 0.93 | 0.86 | 0.92  | 0.94 | 0.91 | 0.91 |      |

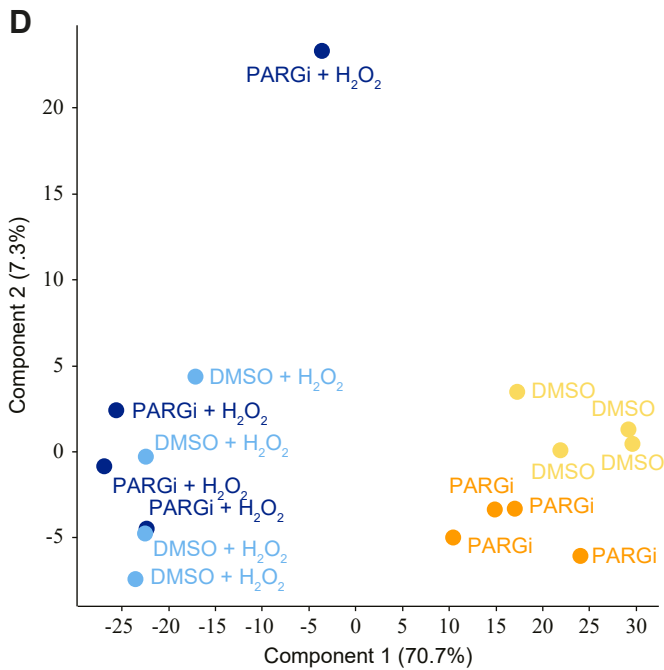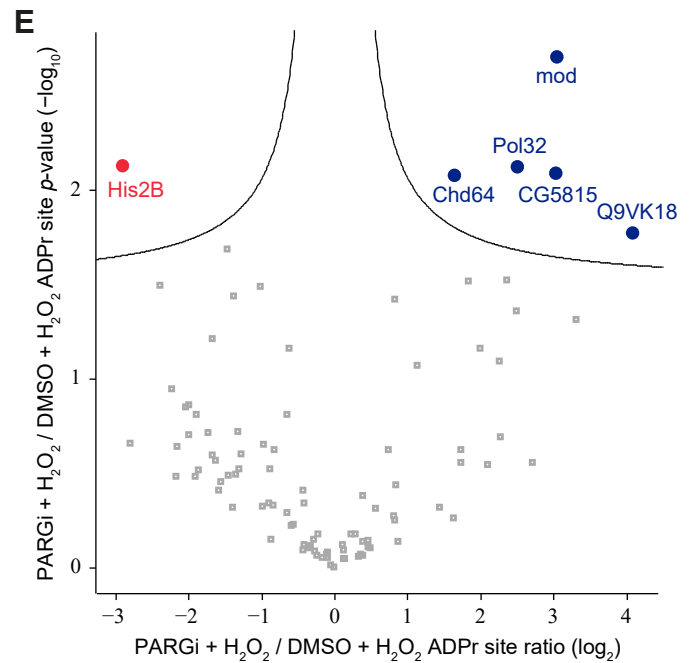

**Supplemental Figure 2. Mass spectrometric identification of ADPr sites in S2R+ cells.**

(A) Localization probability distribution of identified ADPr peptide-spectrum matches (PSMs). The dashed line visualizes the cutoff of >90% localization probability that was used.

(B) Table with all Pearson correlations between different replicates and different conditions.

(C) Histogram visualizing the total number of ADPr sites identified and localized in the four different conditions.

(D) Principal component analysis indicating the highest degree of variance between sample conditions.

(E) Volcano plot analysis visualizing the dynamics of PARGi-treated ADPr sites compared to DMSO-treated ADPr sites under DNA damage. Significance was determined via two-tailed Student's t-testing with a false discovery rate (FDR) of 0.05,  $s_0$  of 0.1, and 2,500 rounds of randomization. ADPr sites significantly upregulated by PARGi treatment are depicted in blue, ADPr sites significantly upregulated upon DMSO treatment are depicted in red, and ADPr sites not significantly regulated are shown in grey.



### A dH1 S199mar

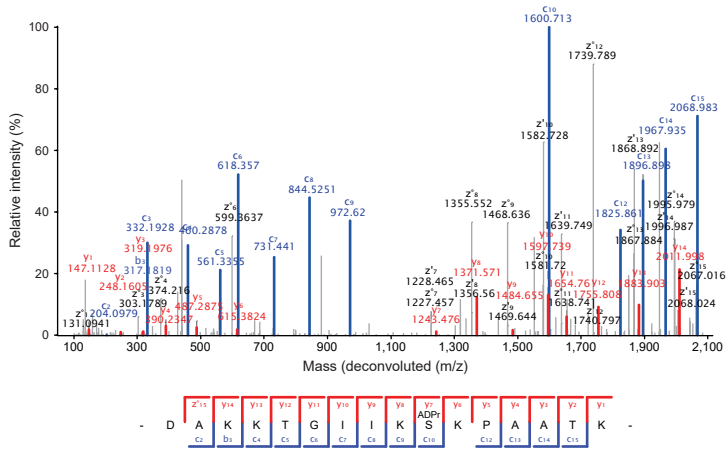

### B dParp S362mar

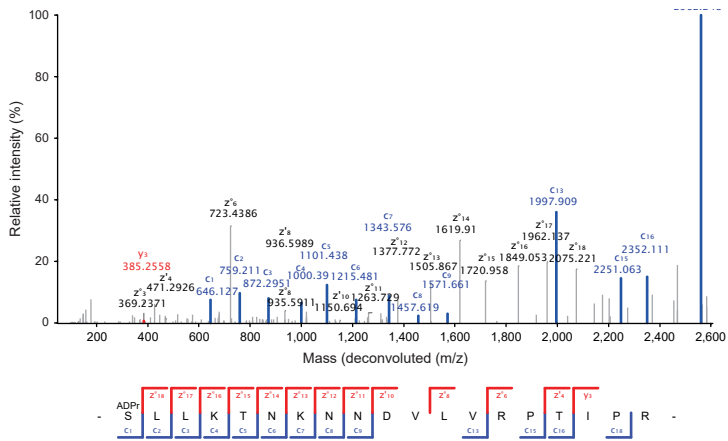

### C dParp S491mar

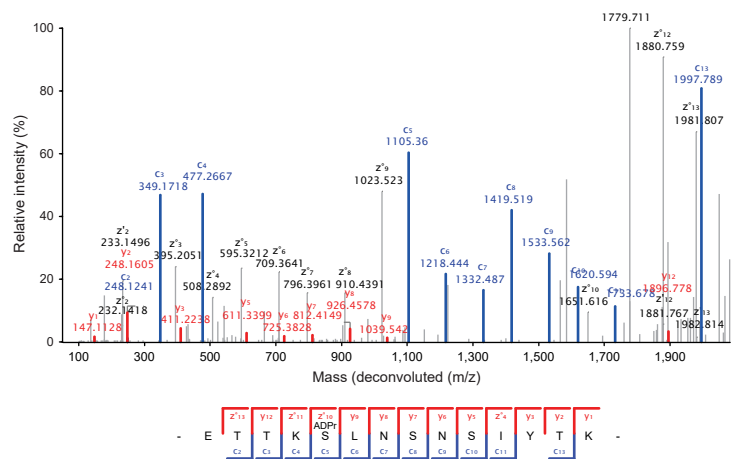

### D dParp S494mar

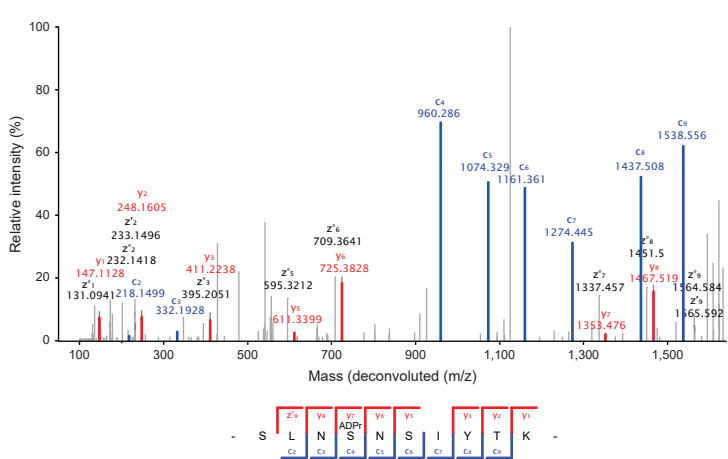

### E dParp S496mar

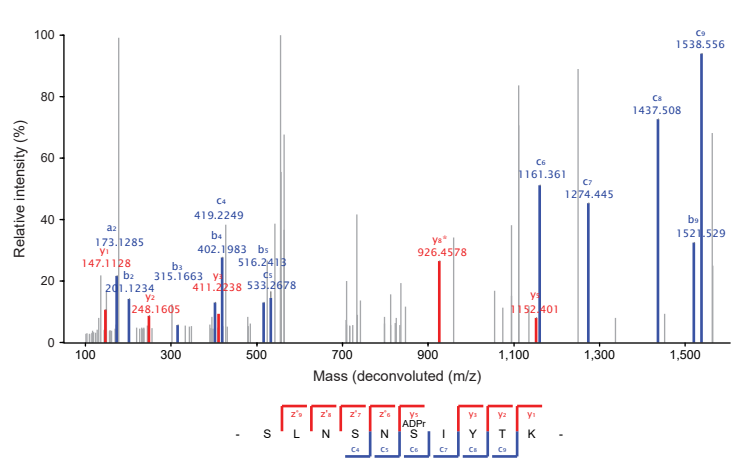

**Supplemental Figure 3. MS spectra of *Drosophila* histone H1 and *d*Parp Ser-ADPr sites.**

(A-E) Annotated ETD tandem mass spectra of ADP-ribosylated peptides. Full fragmentation is obtained, with both c-ions (blue) and z-ions (red) pinpointing the ADPr to reside on a serine residue. The spectra allowed mapping of the peptides to *Drosophila* histone *d*H1 S199 (A), *d*Parp S363 (B), *d*Parp S491 (C), *d*Parp S494 (D), and *d*Parp S496 (E).



**Supplemental Figure 4. Conservation of the PARP automodification domain in insects.**

Multiple sequence alignment of selected insect PARP automodification domain sequences. Ser-ADPr sites identified in *dParp* are indicated above the alignment by double-dagger (‡). Indexing indicates *dParp* residue position.

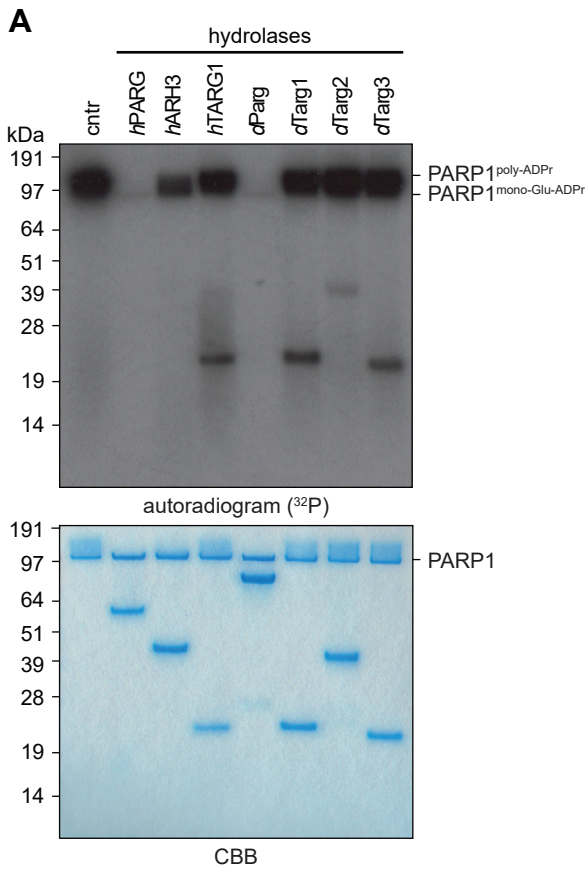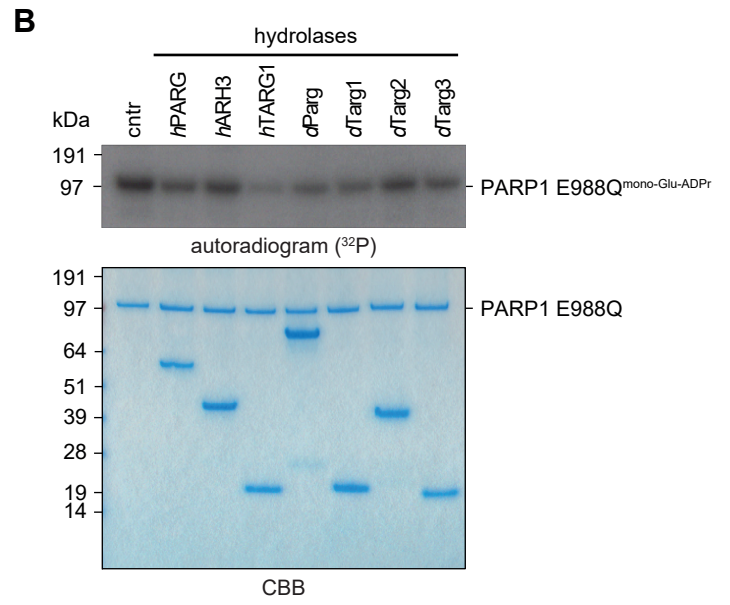

**Supplemental Figure 5. Residue specificity of dParg terminal ADPr hydrolase activity.**

(A) Removal of poly-Glu-ADPr by human and *Drosophila* (ADP-ribosyl)hydrolases on automodified poly-Glu-*h*PARP1. Poly-Glu-ADPr of *h*PARP1 was achieved by incubation of recombinant *h*PARP1 (0.5  $\mu$ M) in the presence of  $^{32}$ P-NAD<sup>+</sup> as ADP-ribose donor. The reaction was performed for 30 min at room temperature. The *h*PARP1 reaction was stopped by the addition of 1  $\mu$ M olaparib. Lower panel shows the CBB stained SDS-PAGE of the proteins. The experiment was repeated independently three times with similar results.

(B) Removal of mono-Glu-ADPr. Mono-Glu-ADPr was achieved by incubation of recombinant *h*PARP1 E988Q mutant (0.5  $\mu$ M) with  $^{32}$ P-NAD<sup>+</sup> as ADP-ribose donor and activated DNA. The reaction of *h*PARP1 was stopped by the addition of 1  $\mu$ M olaparib and subsequently supplemented with the indicated (ADP-ribosyl)hydrolases. Lower panel shows the CBB stained SDS-PAGE. The experiment was repeated independently three times with similar results.

Multiple sequence alignment for the first region of the protein. It includes species names like Drosophila, Melon fly, House fly, Drosophila bunnanda, Human, Domestic cat, Mouse, Common wombat, C. elegans (PARG1), C. elegans (PARG2), Eye worm, Tetrahymena thermophila, and Monosiga brevicollis MX1. Residue positions 33, 43, 53, 63, 69, 77, and 83 are indicated above the alignment.

Multiple sequence alignment for the second region of the protein. Residue positions 92, 104, 114, 119, 131, and 141 are indicated above the alignment. Species names are consistent with the first region.

Multiple sequence alignment for the third region of the protein. Residue positions 151, 161, 170, 179, 189, 199, 209, and 219 are indicated above the alignment.

Multiple sequence alignment for the fourth region of the protein. Residue positions 229, 238, 248, 258, 268, 278, 286, 296, and 306 are indicated above the alignment.

Multiple sequence alignment for the fifth region of the protein, labeled as 'AD-loop 1' and 'AD-loop 2'. Residue positions 316, 326, 336, 346, 356, 365, 375, and 385 are indicated above the alignment. Some residues are boxed in red.

Multiple sequence alignment for the sixth region of the protein, labeled as 'loop 1' and 'Tyr loop'. Residue positions 399, 409, 424, 434, 441, 450, and 460 are indicated above the alignment. Some residues are boxed in red.

Multiple sequence alignment for the seventh region of the protein, labeled as 'loop 2'. Residue positions 470, 480, 490, 498, 508, 518, 528, 538, and 548 are indicated above the alignment. Some residues are boxed in red.

**Supplemental Figure 6. Conservation of PARG within *Animalia*.**

Multiple sequence alignment of the catalytic domain of selected PARG sequences from *Insecta*, *Mammalia*, *Nematoda* and *Protozoa* phyla. The accessory (yellow) and macrodomain (blue) regions are indicated below the alignment and catalytically important regions highlighted by coloured boxes (AD-loop 1 and 2, green; loop 1 and 2, red; Tyr loop, rose). Residues known to be crucial for catalysis are indicated above the alignment by double-dagger (‡) and threonine/leucine residue involved in the loop 1-AD-loop 1 interaction by downward triangle (▼). Indexing indicates *dParp* residue position.



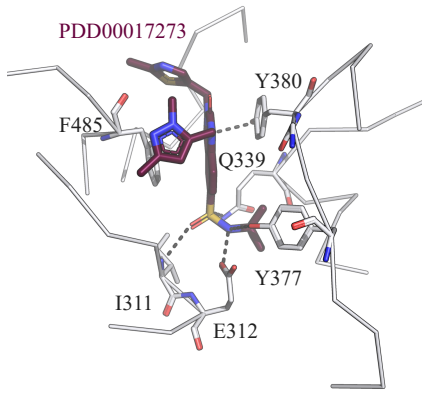

dParg:PARGi (8ADJ)

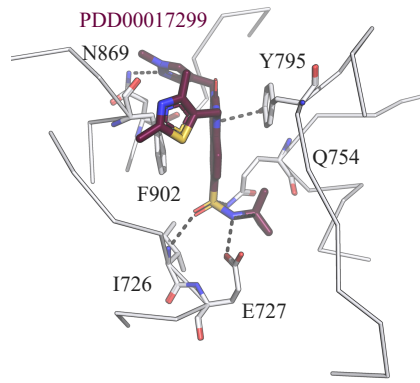

hPARG:PARGi (6HML)

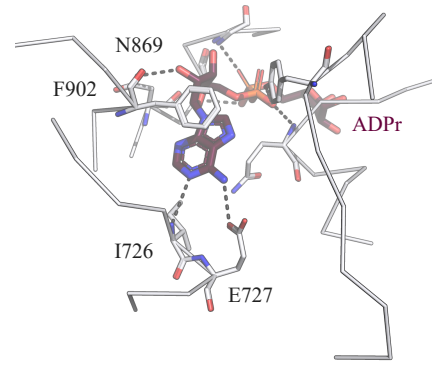

hPARG:ADPr (4B1H)

**Supplemental Figure 7. Structure of the *d*Parg:PDD00017273 complex.**

Ribbon-liquorice representation of the ligand coordination of the *d*Parg:PDD00017273, *h*PARG:PDD00017299, and *h*PARG:ADP-ribose complexes. Residues important for the protein:ligand interaction are highlighted and numbering corresponds to the respective sequences.

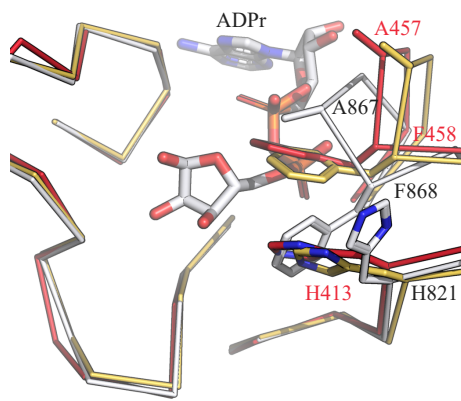

- dPARG apo (8ADK)
- mPARG apo (4FC2)
- mPARG:ADPr (4NA0)

**Supplemental Figure 8. Ligand binding involves conformational changes of loop 2.**

Ribbon-liquorice representation of loop 2 conformational changes triggered by ligand binding. Residue numbers of *d*Parg are given in red and of *m*PARG in black.
