# Supplementary material for: Serine ADP-ribosylation in Drosophila provides insights into the evolution of reversible ADP-ribosylation signalling
Source: PubMed Central journal article supplement (PMC10238386; doi:10.1038/s41467-023-38793-y), 2023-06-02
Supplement: 41467_2023_38793_MOESM2_ESM.pdf [file 41467_2023_38793_MOESM2_ESM.pdf]

## **Description of Additional Supplementary Files**

File Name: Supplementary Data 1

Description: HPF1 sequences across the *Animalia* kingdom used for the phylogenetic analysis.

File Name: Supplementary Data 2

Description: Overview of ADPr sites identified using Af1521 enrichment followed by mass spectrometry.

File Name: Supplementary Data 3

Description: Oligonucleotides used in this study.
